# Supplementary material
Source: publisher figshare collection journal article supplement (https://rs.figshare.com/ndownloader/files/17090141)
Supplement: Supplementary file 1 [file 17090141]

## Sheet: DATA
Plant name	Country	Population	Aarea (μmol m-2 s 1)	gs (mmol m-2 s-1)	Ci (μmol m-2)	Amass(nmol.g-1.s-1)	Intrinsic WUE (μmol CO2 mmol-1 H2O)	Vcmax (m-2 s 1)	Jmax (m-2 s 1)	Hair count bottom	Hair count top	Hair count/mm2 bottom	Hair count/mm2 top	Stomata count bottom	Stomata count top	Stomatal count/mm2 bottom	Stomatal count/mm2 top	Stomatal ratio	N (%)	N mass (g.g-1)	N area (g.m-2)	PNUE (μmol CO2 g-1 N s-1)	Area with petiole (cm2)*	Mass (g)*	LMA (g.m-2)*	*From Brandenburger et al.(2019)
A-17+MZ	South Africa	Arniston	30.1226	0.971923	322.399	573.534	30.9928	123.711	192.227	156	147	65.0271	61.2755	73	67	172.237	187.661	0.917808	1.79	0.0179	0.957766	31.4509	28.034	0.15	53.5065
A-18+M	South Africa	Arniston	31.4686	1.32716	330.24	599.162	23.7112	118.126	199.375	162	121	67.5281	50.4377	66	77	197.943	169.666	1.16667	2.616	0.02616	2.32437	13.5386	36.724	0.3263	88.852
A-19+A	South Africa	Arniston	23.5831	0.646148	322.366	449.022	36.498	105.021	181.346	186	148	77.5323	61.6924	71	68	174.807	182.519	0.957746	2.972	0.02972	1.95217	12.0804	30.235	0.1986	65.6855
A-24+A	South Africa	Arniston	25.8098	1.04437	337.823	491.419	24.7132	113.655	166.614	162	114	67.5281	47.5198	62	45	115.681	159.383	0.725806	2.037	0.02037	1.45525	17.7356	17.175	0.1227	71.441
A-37+N	South Africa	Arniston	31.7314	1.58978	334.79	604.166	19.9596	120.58	210.019	88	102	36.682	42.5177	48	54	138.817	123.393	1.125	2.304	0.02304	1.36674	23.2168	29.72	0.1763	59.3203
A-49+A	South Africa	Arniston	32.4412	1.50006	331.087	617.68	21.6266			126	136	52.5219	56.6903	78	65	167.095	200.514	0.833333	3.921	0.03921	1.68926	19.2044	43.823	0.1888	43.0824
A-49b+A	South Africa	Arniston	29.4493	1.04278	326.967	560.715	28.2412	108.6	166.129										1.977	0.01977	1.87277	15.725	24.354	0.2307	94.7278
A-50+MZ	South Africa	Arniston	30.3532	1.10544	326.425	577.925	27.4579	114.218	201.416	197	94	82.1175	39.183	75	61	156.812	192.802	0.813333					28.524	0.1354	47.4688
A-50b	South Africa	Arniston	32.1104	1.38214	329.555	611.381	23.2324												2.457	0.02457	1.79064	17.9323	33.631	0.2451	72.8792
A-8+A	South Africa	Arniston	26.8836	1.16	338.106	511.863	23.1754			178	122	74.1976	50.8545	50	48	123.393	128.535	0.96	2.511	0.02511	1.95277	13.7669	44.671	0.3474	77.7686
A-9+A	South Africa	Arniston	32.9146	1.12715	319.304	626.694	29.2016			133	100	55.4398	41.684	55	54	138.817	141.388	0.981818	2.346	0.02346	1.91805	17.1604	28.89	0.2362	81.7584
A-5+A	South Africa	Arniston						117.186	205.689	211	153	87.9533	63.7766	77	61	156.812	197.943	0.792208	3.074	0.03074	2.49808		27.515	0.2236	81.2648
L-11+L	Australia	Treachery beach	29.4843	0.747405	307.358	545.459	39.4489			222	72	92.5386	30.0125	38	44	113.111	97.6864	1.15789	3.185	0.03185	1.77593	16.6022	22.113	0.1233	55.7591
L-15+A	Australia	Treachery beach	25.289	0.689642	318.25	467.847	36.6698	105.151	199.036	295	109	122.968	45.4356	65	44	113.111	167.095	0.676923	3.949	0.03949	2.21322	11.4264	20.43	0.1145	56.045
L-16+A	Australia	Treachery beach	24.1235	0.596185	313.39	446.285	40.4631	109.505	183.112	329	90	137.14	37.5156	65	55	141.388	167.095	0.846154	3.786	0.03786	1.5839	15.2305	19.481	0.0815	41.8356
L-17+A	Australia	Treachery beach	31.5344	1.3841	330.888	583.386	22.7833			328	76	136.724	31.6799	47	33	84.8329	120.823	0.702128					20.206	0.1168	57.8046
L-4+W	Australia	Treachery beach	24.0075	0.682869	324.051	444.138	35.1568	86.1943	184.56	180	82	75.0313	34.1809	80	66	169.666	205.656	0.825	3.702	0.03702	2.15561	11.1372	21.244	0.1237	58.2282
L-8+A	Australia	Treachery beach	26.8695	0.512144	290.575	497.085	52.4646	117.977	226.825	299	101	124.635	42.1009	73	65	167.095	187.661	0.890411	4.265	0.04265	1.67506	16.0409	21.668	0.0851	39.2745
L-7+A	Australia	Treachery beach						98.5677	196.748	321	96	133.806	40.0167	55	56	143.959	141.388	1.01818	4.196	0.04196	3.33899		24.216	0.1927	79.5755
W-11+A	Australia	Wairo beach	24.5007	1.02221	341.34	453.263	23.9683	93.7745	162.215	252	103	105.044	42.9346	58	62	159.383	149.1	1.06897	2.795	0.02795	1.35222	18.1188	20.463	0.099	48.38
W-14+W	Australia	Wairo beach	25.2404	0.817878	329.43	466.948	30.8609	107.466	213.625	361	187	150.479	77.9491	100	83	213.368	257.069	0.83	3.132	0.03132	1.97492	12.7805	22.139	0.1396	63.0561
W-19+A	Australia	Wairo beach	21.2143	0.496903	315.986	392.465	42.6931	91.6871	188.345	291	96	121.301	40.0167	83	67	172.237	213.368	0.807229	3.681	0.03681	1.9511	10.873	20.885	0.1107	53.0045
W-28+W	Australia	Wairo beach	22.7559	0.417423	295.339	420.984	54.5152	96.8494	175.405	369	127	153.814	52.9387	77	74	190.231	197.943	0.961039	4.063	0.04063	1.8593	12.2389	17.897	0.0819	45.7619
W-31+W	Australia	Wairo beach	22.3915	0.427997	298.963	414.242	52.3169	97.3683	168.627	293	121	122.134	50.4377	66	54	138.817	169.666	0.818182	3.419	0.03419	1.86395	12.0129	19.535	0.1065	54.5175
W-4+W	Australia	Wairo beach	29.4843	0.747405	307.358	545.459	39.4489			244	75	101.709	31.263	90	65	167.095	231.362	0.722222					21.953	0.1475	67.189
W-5+L	Australia	Wairo beach	25.1365	0.367428	269.658	465.024	68.4119	116.168	193.566	291	106	121.301	44.1851	85	84	215.938	218.509	0.988235					26.43	0.1787	67.6126
W-8+W	Australia	Wairo beach	28.7121	0.762995	311.563	531.174	37.6308			372	112	155.065	46.6861	56	86	221.08	143.959	1.53571					30.06	0.1486	49.4345
W-9+W	Australia	Wairo beach	32.8316	1.22365	322.402	607.385	26.8308			308	126	128.387	52.5219	93	66	169.666	239.075	0.709677					30.304	0.1907	62.929
M-1+L	Australia	Mallacoota	28.1617	0.683656	307.818	520.991	41.1927			329	100	137.14	41.684	106	71	182.519	272.494	0.669811					30.47	0.1995	65.4742
M-11+M	Australia	Mallacoota	28.7376	0.877255	320.163	531.645	32.7585			240	97	100.042	40.4335	65	59	151.671	167.095	0.907692					24.663	0.1448	58.7114
M-18+M	Australia	Mallacoota	18.7673	0.277818	280.838	347.196	67.5526	88.0882	174.945	257	105	107.128	43.7682	56	49	125.964	143.959	0.875	3.185	0.03185	1.55461	12.0721	27.064	0.1321	48.8102
M-19+M	Australia	Mallacoota	30.7559	0.950533	316.129	568.984	32.3565			224	101	93.3722	42.1009	56	64	164.524	143.959	1.14286					26.809	0.1869	69.7154
M-26+A	Australia	Mallacoota	25.1491	0.496415	295.368	465.259	50.6616	119.021	198.104	377	137	157.149	57.1071	66	76	195.373	169.666	1.15152	2.344	0.02344	1.73095	14.5291	25.824	0.1907	73.846
M-27+A	Australia	Mallacoota	28.7449	0.800214	314.084	531.78	35.9215			312	109	130.054	45.4356	74	65	167.095	190.231	0.878378					18.742	0.1137	60.6659
M-28+A	Australia	Mallacoota	26.3416	0.509892	294.923	487.319	51.6611	107.609	180.724	241	127	100.459	52.9387	48	70	179.949	123.393	1.45833	3.971	0.03971	1.78976	14.7179	16.463	0.0742	45.0708
M-29+A	Australia	Mallacoota	33.2144	0.925273	307.57	614.466	35.8968	141.643	247.912	365	135	152.147	56.2734	106	89	228.792	272.494	0.839623	4.72	0.0472	1.95199	17.0156	33.103	0.1369	41.3558
M-31+M	Australia	Mallacoota	19.6748	0.466617	319.016	363.984	42.1648	84.9207	184.505	264	103	110.046	42.9346	69	55	141.388	177.378	0.797101	2.734	0.02734	1.47802	13.3116	16.574	0.0896	54.0606
M-4+L	Australia	Mallacoota	23.4188	0.684344	326.723	433.249	34.2209	85.7844	163.056	284	105	118.383	43.7682	74	53	136.247	190.231	0.716216	2.913	0.02913	1.63001	14.3673	24.394	0.1365	55.9564
N-1+N	Australia	Narooma	30.144	0.687741	304.566	557.664	43.8305			252	134	105.044	55.8566	81	71	182.519	208.226	0.876543					25.266	0.1595	63.1283
N-14+N	Australia	Narooma	24.2763	0.810049	329.467	449.112	29.969	106.159	209.957	328	110	136.724	45.8524	85	68	174.807	218.509	0.8	3.939	0.03939	2.5613	9.47814	26.99	0.1755	65.0241
N-20+A	Australia	Narooma	22.798	0.621805	323.455	421.762	36.6642	85.2691	158.727	267	94	111.296	39.183	77	58	149.1	197.943	0.753247	3.716	0.03716	2.28271	9.98724	28.716	0.1764	61.4292
N-21+A	Australia	Narooma	23.526	0.668744	325.169	435.231	35.1794	83.9013	179.024	273	105	113.797	43.7682	76	74	190.231	195.373	0.973684	4.306	0.04306	2.2588	10.4153	27.127	0.1423	52.457
N-24+A	Australia	Narooma	25.2477	0.845988	330.05	467.083	29.8441	104.037	189.984	383	104	159.65	43.3514	42	65	167.095	107.969	1.54762	2.922	0.02922	1.64899	15.311	19.74	0.1114	56.4336
N-3+M	Australia	Narooma	28.6682	0.813284	314.898	530.362	35.2499			292	116	121.717	48.3535	58	54	138.817	149.1	0.931034					29.608	0.166	56.0659
N-8+M	Australia	Narooma	20.3817	0.408192	305.138	377.061	49.9316	90.1225	191.873	304	74	126.719	30.8462	84	59	151.671	215.938	0.702381	4.46	0.0446	1.88433	10.8164	21.16	0.0894	42.2495
N-9+L	Australia	Narooma	25.0224	0.52528	300.791	462.915	47.6364			286	106	119.216	44.1851	52	53	136.247	133.676	1.01923					18.044	0.0895	49.601
